# Supplementary material for: Restarting Neglected Tropical Diseases Programs in West Africa during the COVID-19 Pandemic: Lessons Learned and Best Practices
Source: PubMed Central journal article supplement (PMC8641318; doi:10.4269/ajtmh.21-0408), 2021-10-20
Supplement: tpmd210408.SD1.pdf [file tpmd210408.SD1.pdf]

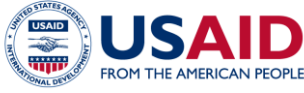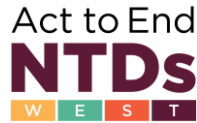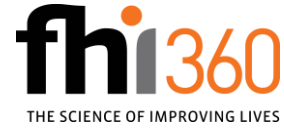

**Considerations for Resuming NTD programs (“NTD Restart Matrix”)**

Country:

Date:

Name and title of the person filling the form:

|          | Domain                                                                                                                                                                                   | Details | Comments | Source of information |
|----------|------------------------------------------------------------------------------------------------------------------------------------------------------------------------------------------|---------|----------|-----------------------|
| <b>1</b> | <b>RISKS</b>                                                                                                                                                                             |         |          |                       |
|          | COVID-19 Situation (as of DATE)                                                                                                                                                          |         |          |                       |
|          | No. of Cases Reported                                                                                                                                                                    |         |          |                       |
|          | Trends/No. of incident cases for the last 14 days                                                                                                                                        |         |          |                       |
|          | Projection of the number of cases for the next 7, 14 and 21 days (if known)                                                                                                              |         |          |                       |
|          | Contact tracing                                                                                                                                                                          |         |          |                       |
|          | No. of Deaths Reported                                                                                                                                                                   |         |          |                       |
|          | Location of Cases/Deaths (e.g. capital city, limited to certain regions, etc.)                                                                                                           |         |          |                       |
|          | Status of COVID-19 testing/availability                                                                                                                                                  |         |          |                       |
|          | Other important considerations (e.g. doubling rate, etc.)                                                                                                                                |         |          |                       |
|          | Epidemiological situation of the NTDs AND COVID-19 in areas targeted to restart MDA?                                                                                                     |         |          |                       |
|          | Epidemiological situation of the NTDs AND COVID-19 in areas targeted to restart DSA?                                                                                                     |         |          |                       |
|          | <b>Risk Assessment &amp; Mitigation Plan</b>                                                                                                                                             |         |          |                       |
|          | <b>Risk Assessments</b>                                                                                                                                                                  |         |          |                       |
|          | Provide details for any risk assessment(s) undertaken for NTD activities                                                                                                                 |         |          |                       |
|          | Provide details for any NTD Risk Assessment tools piloted in the country.                                                                                                                |         |          |                       |
|          | <b>Mitigation Plans</b>                                                                                                                                                                  |         |          |                       |
|          | Detail any plans to conduct non-health related field activities (example – income generating activities for groups of women) in areas with no COVID-19 /programming based on prevalence. |         |          |                       |
|          | Describe the risk mitigation plan in place for community health activities at-large -e. g NTD MDAs, bed nets distribution (if applicable).                                               |         |          |                       |
|          | Support/assistance from implementing partners (IPs)                                                                                                                                      |         |          |                       |
|          | Describe the risk mitigation plan specifically for campaign and/or NTD activities (e.g. modified/adapted MDA/DSA strategies to minimize direct contact/exposure such as                  |         |          |                       |

|                                                                      |                                                                                                                                                                                                                                                                  |  |  |  |
|----------------------------------------------------------------------|------------------------------------------------------------------------------------------------------------------------------------------------------------------------------------------------------------------------------------------------------------------|--|--|--|
|                                                                      | remote/virtual trainings, small groups trainings, door-to-door versus fixed point distribution etc.).                                                                                                                                                            |  |  |  |
|                                                                      | Do more training sessions need to be held in multiple or larger venues utilized to ensure physical distancing?                                                                                                                                                   |  |  |  |
|                                                                      | Do training curricula need to be modified/time added to training to incorporate COVID-19 prevention aspects?                                                                                                                                                     |  |  |  |
|                                                                      | Does the MDA timeline need to be extended to accommodate COVID prevention measures?                                                                                                                                                                              |  |  |  |
|                                                                      | Are there any discussions underway, or plans to combine/integrate interventions (community or other) to reduce exposure?                                                                                                                                         |  |  |  |
|                                                                      | What adaptive measures are implemented to avoid transmission of COVID 19 during school-based distribution?<br><br>For example: Could the dose-poles be drawn on a wall in the classroom to minimize contacts/exposure during measurements for drug distribution? |  |  |  |
|                                                                      | Does the government plan to widely distribute guidance or policies around WASH? Would NTDs be part of it?                                                                                                                                                        |  |  |  |
|                                                                      | Could adaptive measures potentially introduce selection biases, discrimination/segregation of groups of people regarding MDA?                                                                                                                                    |  |  |  |
|                                                                      | Please comment about any additional time and resources needed to plan and conduct an MDA or a DSA given the COVID situation                                                                                                                                      |  |  |  |
| <b>Communication about COVID-19 and Social Mobilization for NTDs</b> |                                                                                                                                                                                                                                                                  |  |  |  |
|                                                                      | Is a specific COVID-19/NTD risk communication and community engagement plan/strategy developed?                                                                                                                                                                  |  |  |  |
|                                                                      | Are NTD communication plans being adjusted to include COVID-19 education and messaging?                                                                                                                                                                          |  |  |  |
|                                                                      | Are supervisors, teachers, CDDs and health workers fully aware and involved in the communication about NTD campaigns/interventions in the context of COVID 19                                                                                                    |  |  |  |
|                                                                      | Are local NTD implementing partners involved and supportive of the communication efforts about NTDs in the context of COVID 19?                                                                                                                                  |  |  |  |

|          |                                                                                                                                                             |  |  |  |
|----------|-------------------------------------------------------------------------------------------------------------------------------------------------------------|--|--|--|
|          | Are local media, community radios, TV, social media and all relevant channels used CONSISTENTLY for messaging and education about COVID 19                  |  |  |  |
| <b>2</b> | <b>POLICIES</b>                                                                                                                                             |  |  |  |
|          | <b>National Government</b>                                                                                                                                  |  |  |  |
|          | Briefly explain the structure, membership, and function of the National COVID-19 Response Task Force or Coordination Unit (or equivalent)                   |  |  |  |
|          | Does the national COVID-19 response unit has decentralized entities in the regions and districts?                                                           |  |  |  |
|          | Status of key public measures by national authorities (e.g. limitation of the number of people allowed in a meeting, gathering, travel authorizations etc.) |  |  |  |
|          | Do the appropriate authorities above the MOH approve of starting NTD activities? If so, how is this documented officially?                                  |  |  |  |
|          | Does the highest authority (above MoH) in the country approves the restarting of NTD activities?                                                            |  |  |  |
|          | <b>Ministry of Health</b>                                                                                                                                   |  |  |  |
|          | Does the MOH approve of starting NTD activities?                                                                                                            |  |  |  |
|          | Is the NTDP and MOH aligned with the decision to resume NTD activities?                                                                                     |  |  |  |
|          | Are central level staff being tested for COVID-19 before being allowed to undertake field activities?                                                       |  |  |  |
|          | <b>USAID Washington (to complete)</b>                                                                                                                       |  |  |  |
|          | Has USAID/W issued any COVID-19 guidance to IPs operating in country?                                                                                       |  |  |  |
|          | Has the USAID/Mission issued any COVID-19 restrictions that would apply to implementation of NTD field activities?                                          |  |  |  |
|          | <b>WHO Country Office</b>                                                                                                                                   |  |  |  |
|          | What is the WHO country office position on resuming NTD field activities?                                                                                   |  |  |  |
|          | How has the WHO Country office been engaged in risk assessment or mitigation for NTD activities?                                                            |  |  |  |
|          | Does the WHO country office attend regular COVID-19 meetings organized by the MoH?                                                                          |  |  |  |

| <b>Schools</b>                                                                                                                               |  |  |  |
|----------------------------------------------------------------------------------------------------------------------------------------------|--|--|--|
| Are schools open? Or is there a date for re-opening?                                                                                         |  |  |  |
| What are the policies in place for reducing transmission in schools?                                                                         |  |  |  |
| Does each school have a handwashing facility? (tap water, dipping water in a station?)                                                       |  |  |  |
| Does the school system have a reporting system for COVID-19?                                                                                 |  |  |  |
| <b>Status of other Community-based Interventions (non-NTD)</b>                                                                               |  |  |  |
| Provide details for any other public health mass campaigns underway (e.g malaria, vitamin A, immunization etc.).                             |  |  |  |
| Are there any activities proceeding that MDA or DSAs could be feasibly linked to?                                                            |  |  |  |
| <b>3 CAPACITY AND READINESS</b>                                                                                                              |  |  |  |
| <b>Drug Supply</b>                                                                                                                           |  |  |  |
| Are drugs available and in the right place?                                                                                                  |  |  |  |
| Are any NTD drugs expiring in the next quarter as a result of COVID-19 delays?                                                               |  |  |  |
| Are all necessary commodities available (e.g. tests for DSAs, etc.)                                                                          |  |  |  |
| <b>PPE Status</b>                                                                                                                            |  |  |  |
| What is the availability of PPE (hydro-alcoholic solutions, facemasks, gloves etc.) to the NTD Program staff and community drug distributors |  |  |  |
| Is PPE procurement available on the local market?                                                                                            |  |  |  |
| If PPE procurement is needed, who will procure it?                                                                                           |  |  |  |
| <b>Human Resource Availability</b>                                                                                                           |  |  |  |
| Are NTDP staff availability for NTD activities (e.g. supervision of field activities)?                                                       |  |  |  |
| Are key Regional/District Level staff available for NTD activities (e.g. supervision)?                                                       |  |  |  |
| Are CDDs available for training/drug distribution and willing to participate?                                                                |  |  |  |
| Have NTD staff at any level been re-assigned to COVID-19 activities?                                                                         |  |  |  |
