# Supplementary material for: Restarting Neglected Tropical Diseases Programs in West Africa during the COVID-19 Pandemic: Lessons Learned and Best Practices
Source: PubMed Central journal article supplement (PMC8641318; doi:10.4269/ajtmh.21-0408), 2021-10-20
Supplement: tpmd210408.SD2.pdf [file tpmd210408.SD2.pdf]

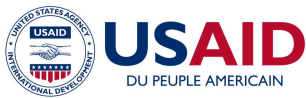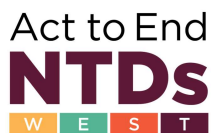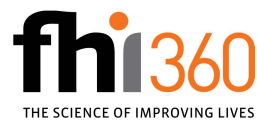

**COVID-19 / NTD DSA SUPERVISION CHECKLIST**

**Instructions:** *The supervisor should complete the sections for which she or he has information or obtain it by direct field observation, consulting documents on-site, or interviewing field team members or key informants. Supervisors should select "N/A" if the item doesn't apply to the local context.*

| SUPERVISION CHECKLIST FOR NTD DISEASE-SPECIFIC SURVEYS                                                                                                                                                                                                             |  |                                                                                                                  |                                     |     |                                           |
|--------------------------------------------------------------------------------------------------------------------------------------------------------------------------------------------------------------------------------------------------------------------|--|------------------------------------------------------------------------------------------------------------------|-------------------------------------|-----|-------------------------------------------|
| <b>Supervisor (first and last name):</b>                                                                                                                                                                                                                           |  | <ul style="list-style-type: none"> <li>- District:</li> <li>- Subdistrict:</li> <li>- Village/School:</li> </ul> |                                     |     |                                           |
| <b>Date:</b>                                                                                                                                                                                                                                                       |  |                                                                                                                  |                                     |     |                                           |
| Phone number                                                                                                                                                                                                                                                       |  |                                                                                                                  |                                     |     |                                           |
| Type of supervised activity? Please circle one:<br>Pre-TAS - TAS - TIS - TSS - Pre-STOP OV MDA - SCH/STH survey                                                                                                                                                    |  |                                                                                                                  |                                     |     |                                           |
| <b>Number of new and active COVID -19 cases in the district (or site) in the last 2 weeks:</b>                                                                                                                                                                     |  |                                                                                                                  |                                     |     |                                           |
|                                                                                                                                                                                                                                                                    |  |                                                                                                                  | Please check one of the boxes below |     |                                           |
| I - Preparation and logistics                                                                                                                                                                                                                                      |  | Yes                                                                                                              | No                                  | N/A | If no, are corrections brought up Yes/No? |
| Supervisors are tested for COVID-19 before travelling to the field                                                                                                                                                                                                 |  |                                                                                                                  |                                     |     |                                           |
| Are materials, equipment, tools pre-arranged and deployed on the site to minimize movements and disturbance by the survey team?                                                                                                                                    |  |                                                                                                                  |                                     |     |                                           |
| Are there enough masks, gloves, hand sanitizer available in the field?                                                                                                                                                                                             |  |                                                                                                                  |                                     |     |                                           |
| Are there enough face-shields available in the field?                                                                                                                                                                                                              |  |                                                                                                                  |                                     |     |                                           |
| The means of transportation to and from the site are enough for the staff to respect a minimum of social distancing in each vehicle (maximum four persons per vehicle including the driver)                                                                        |  |                                                                                                                  |                                     |     |                                           |
| II – Planning                                                                                                                                                                                                                                                      |  |                                                                                                                  |                                     |     |                                           |
| COVID-19 mitigation measures have been communicated and related documents are made available to local authorities and medical staff                                                                                                                                |  |                                                                                                                  |                                     |     |                                           |
| The exact date, time and duration of field operations are known to the target communities a week before the launch                                                                                                                                                 |  |                                                                                                                  |                                     |     |                                           |
| No other parallel (or concomitant) activities -capable of disturbing or confusing the survey -will occur during NTD activities (Example: Vaccination campaign, nutrition/vitamin A, mass protests, markets, recreational activities, traditional etc.) in the site |  |                                                                                                                  |                                     |     |                                           |
| III - Training                                                                                                                                                                                                                                                     |  |                                                                                                                  |                                     |     |                                           |
| The training room is well ventilated, free of any clustering of people and has good air circulation between the rows                                                                                                                                               |  |                                                                                                                  |                                     |     |                                           |
| Have participants been checked for symptoms (temperature, or clinical                                                                                                                                                                                              |  |                                                                                                                  |                                     |     |                                           |

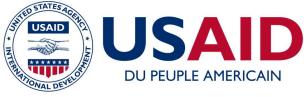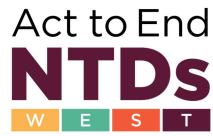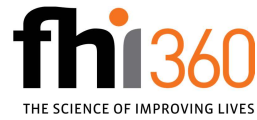

|                                                                                                                                                    |  |  |  |  |
|----------------------------------------------------------------------------------------------------------------------------------------------------|--|--|--|--|
| symptoms) and are proper procedures followed?                                                                                                      |  |  |  |  |
| Furniture and equipment are properly disinfected before and after the sessions                                                                     |  |  |  |  |
| There are fewer than 50 persons in each training room                                                                                              |  |  |  |  |
| The physical distance of at least 2 meters between participants is always observed in the room                                                     |  |  |  |  |
| Everyone in the room wears a mask properly (covering mouth and nose)                                                                               |  |  |  |  |
| Is a handwashing device or hand sanitizer available in the room                                                                                    |  |  |  |  |
| All the people in the room washed their hands with soap or used hand sanitizer before and after the training                                       |  |  |  |  |
| The phone numbers and addresses of all participants were recorded (to allow tracing and tracking later -on if needed)                              |  |  |  |  |
| <b>IV - Communication and Social Mobilization</b>                                                                                                  |  |  |  |  |
| Messaging on COVID-19 and NTDs was communicated to everyone at the site and included COVID-19 prevention measures                                  |  |  |  |  |
| IEC material on COVID-19 is available in the field                                                                                                 |  |  |  |  |
| The social distancing of 2 metres between participants is enforced during messaging and social mobilization (through local communication channels) |  |  |  |  |
| <b>V - Mitigation measures during field survey</b>                                                                                                 |  |  |  |  |
| Are crowd control measures in place?                                                                                                               |  |  |  |  |
| The social distancing of 2 meters between participants is enforced during any registration or pre-selection of participants                        |  |  |  |  |
| Are most people wearing masks in the community where the survey is taking place                                                                    |  |  |  |  |
| Are the participants selected for the survey wearing masks?                                                                                        |  |  |  |  |
| Do all the officers involved in the survey wear a mask?                                                                                            |  |  |  |  |
| Is the mask properly worn by participants, community volunteers and investigators?                                                                 |  |  |  |  |
| Are survey participants coming per selected household or pre-assigned groups to the site                                                           |  |  |  |  |
| The social distancing of 2 metres between participants and all other field officers is observed during the survey                                  |  |  |  |  |
| The social distancing of 2 meters between participants is strictly applied during coffee breaks and lunch                                          |  |  |  |  |
| The social distancing of 2 meters between participants is respected during photos (if any photo is taken)                                          |  |  |  |  |

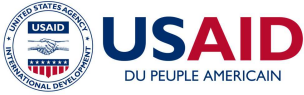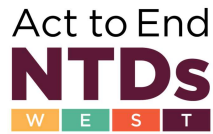

|                                                                                                                                                                                   |  |  |  |  |
|-----------------------------------------------------------------------------------------------------------------------------------------------------------------------------------|--|--|--|--|
| The temperature of each participant is taken at a distance with a laser thermometer                                                                                               |  |  |  |  |
| The temperature of each surveyor/operator has been checked at a distance with a laser thermometer                                                                                 |  |  |  |  |
| All the technicians involved in blood collection and sample handling are wearing masks and gloves                                                                                 |  |  |  |  |
| Availability of Alcohol-based hand sanitizers on site                                                                                                                             |  |  |  |  |
| self-monitoring of COVID-19 symptoms is done by DSA actors (Supervisors, Investigators and aides on a daily basis                                                                 |  |  |  |  |
| Availability of on-site functional handwashing devices with soap and water                                                                                                        |  |  |  |  |
| Participants in the survey use hand sanitizer or wash their hands before being examined/finger pricked for blood sampling                                                         |  |  |  |  |
| Operators/surveyor and technicians use hand sanitizer before and after each participant's examination                                                                             |  |  |  |  |
| The equipment and furniture used are regularly disinfected and cleaned with a solution of disinfectant in the field                                                               |  |  |  |  |
| People exhibiting COVID-19 symptoms (e.g. coughing, exhaustion, difficulty breathing, sneezing etc.) will not participate in the survey and referred to the nearest health center |  |  |  |  |
| Are biomedical waste management devices (trash can or bin with lid) in place at the site?                                                                                         |  |  |  |  |
| <b>VI. Community Perception</b>                                                                                                                                                   |  |  |  |  |
| Are rumors in the community reported to the supervisors by aides or community leaders                                                                                             |  |  |  |  |
| Local people recognize the COVID-19 pandemic as a reality in the country                                                                                                          |  |  |  |  |
| Parents of students are sensitized and cooperate with the team of investigators                                                                                                   |  |  |  |  |
| Local authorities (traditional, administrative and religious leaders) fully adhere to mitigation measures                                                                         |  |  |  |  |
| Participants and local communities have not expressed any concern or issues before and during field operations                                                                    |  |  |  |  |
| The local population is satisfied with the hygiene and protective measures put in place before and during the field activity                                                      |  |  |  |  |
| <b>V- Problems/Issues encountered</b>                                                                                                                                             |  |  |  |  |
|                                                                                                                                                                                   |  |  |  |  |

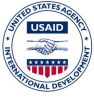

**USAID**  
DU PEUPLE AMERICAIN

Act to End  
**NTDs**  
W E S T

**fhi360**  
THE SCIENCE OF IMPROVING LIVES

**Supervisor's signature**

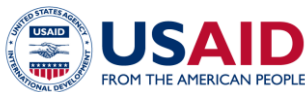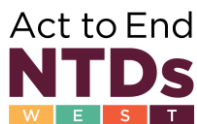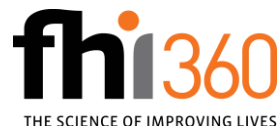

## Supervision Checklist - COVID-19 Barrier Measures during MDA

**Region:**

**District:**

**Health center:**

**Supervisor team:**

**Date:**

**Instructions:** Please consider your country SOP when completing this checklist and select “N/A” if the measure does not apply to your context. The first section (COVID-19 epidemic) is a questionnaire for health district staff involved in NTD activities. The remaining sections are observations, feelings and actions of the supervisor filling in this checklist. If a teacher is distributing the drugs in a school-based distribution, consider them as the “CDD”.

| Questions                                                                                                                                        | Please check one of the boxes below |    |     |                                           |
|--------------------------------------------------------------------------------------------------------------------------------------------------|-------------------------------------|----|-----|-------------------------------------------|
|                                                                                                                                                  | Yes                                 | No | N/A | If no, are corrections brought up Yes/No? |
| <b>1. COVID-19 epidemic:</b>                                                                                                                     |                                     |    |     |                                           |
| Are there any known positive cases in the district in the last two weeks?                                                                        |                                     |    |     |                                           |
| If yes, what is the number of cases?                                                                                                             |                                     |    |     |                                           |
| Have supervisors been tested for COVID-19 in the week before travelling for supervision?                                                         |                                     |    |     |                                           |
| If yes, did anyone test positive?                                                                                                                |                                     |    |     |                                           |
| If yes, NTDP procedure followed?                                                                                                                 |                                     |    |     |                                           |
| Is self-monitoring of COVID-19 symptoms done by MDA actors (Supervisors and CDDs) on a daily basis?                                              |                                     |    |     |                                           |
| If yes, is self-monitoring reported to chief of mission?                                                                                         |                                     |    |     |                                           |
| Were COVID-19 preventive and barrier measures (social mobilization, hand washing, physical distancing etc.) covered during the training of CDDs? |                                     |    |     |                                           |
| If yes, were these messages included in communications via public criers, CDDs, radio?                                                           |                                     |    |     |                                           |
| <b>2. Hygiene measures</b>                                                                                                                       |                                     |    |     |                                           |
| Are participants washing their hands or using hand sanitizer before receiving treatment?                                                         |                                     |    |     |                                           |

|                                                                                                                                                                                                                  |  |  |  |  |
|------------------------------------------------------------------------------------------------------------------------------------------------------------------------------------------------------------------|--|--|--|--|
| Are CDDs wearing gloves during MDA?                                                                                                                                                                              |  |  |  |  |
| Are CDDs using clean tools (e.g. spoons, trays, bottle caps) to give pills to participants?                                                                                                                      |  |  |  |  |
| If no, are CDDs touching pills or participants with their hands?                                                                                                                                                 |  |  |  |  |
| <b>3. Barrier measures during MDA</b>                                                                                                                                                                            |  |  |  |  |
| Are the CDDs wearing a mask/facial covering during activities?                                                                                                                                                   |  |  |  |  |
| If yes, is the mask/facial covering being worn properly (i.e. covers nose and mouth)?                                                                                                                            |  |  |  |  |
| Are the participants wearing a mask/facial covering during the MDA?                                                                                                                                              |  |  |  |  |
| Is the physical distancing (2 meters) being respected between CDDs and participants during MDA including inside a house, if applicable? (Except for when the CDD physically gives the pills to the participant). |  |  |  |  |
| Are participants touching the dose pole during their measurement (with any part of their body)?                                                                                                                  |  |  |  |  |
| If yes, is the dose pole washed or disinfected after each household?                                                                                                                                             |  |  |  |  |
| If no, how is the dose pole being held?                                                                                                                                                                          |  |  |  |  |
| <b>4. MDA strategy</b> (please ignore the questions related to the MDA strategy that you are not using currently in your context if using paper format for the survey)                                           |  |  |  |  |
| <input type="checkbox"/> Door to door<br><input type="checkbox"/> Fixed point<br><input type="checkbox"/> School based                                                                                           |  |  |  |  |
| <b>Door-to-Door</b>                                                                                                                                                                                              |  |  |  |  |
| Only household members being treated together (without other people from another household)?                                                                                                                     |  |  |  |  |
| If no, <b>which</b> specific prevention/barrier measures are being taken?                                                                                                                                        |  |  |  |  |
| Are community members following CDDs from house to house                                                                                                                                                         |  |  |  |  |
| If yes, what crowd control measures are in place                                                                                                                                                                 |  |  |  |  |

|                                                                                                                                                                                          |  |  |  |  |
|------------------------------------------------------------------------------------------------------------------------------------------------------------------------------------------|--|--|--|--|
| Are CDDs washing their hand or using hand sanitizer before entry and after exit of house compound?                                                                                       |  |  |  |  |
| <b>Fixed Point</b>                                                                                                                                                                       |  |  |  |  |
| Are people from the community crowding around CDDs during MDA (within 2 meters)?                                                                                                         |  |  |  |  |
| If yes, what the crowd control measures in place                                                                                                                                         |  |  |  |  |
| Are most people from the community wearing a mask outside their homes?                                                                                                                   |  |  |  |  |
| <b>School-based</b>                                                                                                                                                                      |  |  |  |  |
| If school-based, are students being treated outside the classroom in a school-based MDA?                                                                                                 |  |  |  |  |
| If school-based, are there hand washing stations in the school compound?                                                                                                                 |  |  |  |  |
| Are students wearing masks in the school compound?                                                                                                                                       |  |  |  |  |
| Is physical distancing of 2 meters respected in the school compound?                                                                                                                     |  |  |  |  |
| <b>5. Impact of COVID 19 on MDA participation</b>                                                                                                                                        |  |  |  |  |
| Were the CDDs generally reluctant to participate in the MDA due to COVID-19?                                                                                                             |  |  |  |  |
| If yes, could you provide more information                                                                                                                                               |  |  |  |  |
| Were the communities generally reluctant to participate in the MDA due to COVID-19?                                                                                                      |  |  |  |  |
| If yes, could you provide more information                                                                                                                                               |  |  |  |  |
| Did you take photos and or make short videos of the MDA activities in COVID-19 context and share with partners and donors?                                                               |  |  |  |  |
| if yes, were participants asked to tick a box at registration giving permission to use their photos/videos publicly (and told that they will still receive the drugs if they tick 'no')? |  |  |  |  |
| Any other thoughts or observations including logistics                                                                                                                                   |  |  |  |  |

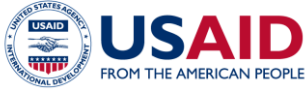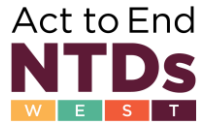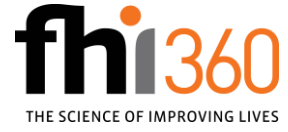

Corrective measures put in place in case of insufficiencies observed \_\_\_\_\_
